# Supplementary material for: Employing non-targeted interactomics approach and subcellular fractionation to increase our understanding of the ghost proteome
Source: PubMed Central journal article supplement — iScience. 2023 Jan 6;26(2):105943. doi: 10.1016/j.isci.2023.105943 (PMC9971881; doi:10.1016/j.isci.2023.105943), 2023-01-06
Supplement: mmc1.pdf [file mmc1.pdf]

**iScience, Volume 26**

**Supplemental information**

**Employing non-targeted interactomics approach  
and subcellular fractionation to increase our  
understanding of the ghost proteome**

**Diego Fernando Garcia-del Rio, Tristan Cardon, Sven Eyckerman, Isabelle Fournier, Amelie Bonnefond, Kris Gevaert, and Michel Salzet**

# Supplemental Figures

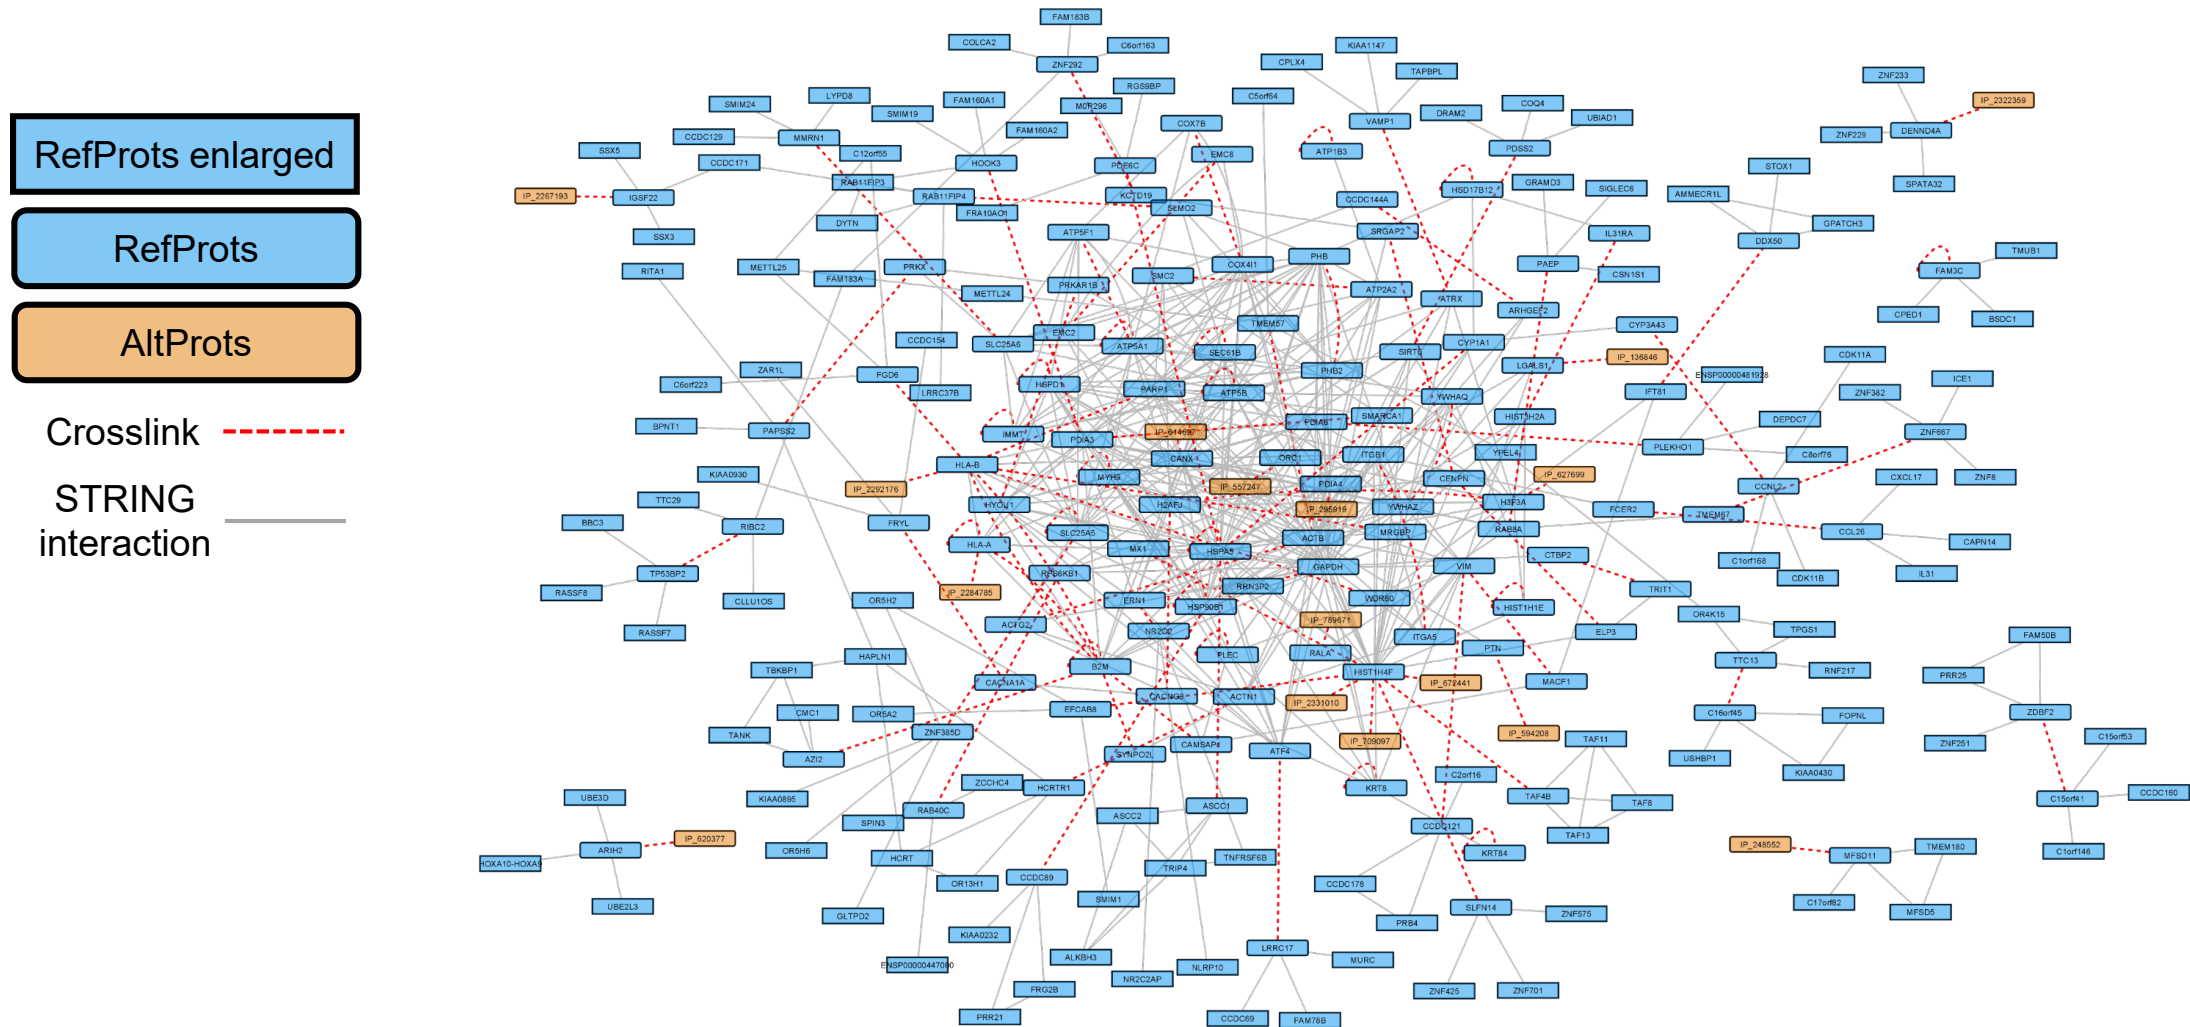

**Figure S1. Crosslinked network enriched by the STRING interactions (gray lines) retrieved between these crosslinked (red dash lines) RefProts. Related to Figure 5. For the RefProts that did not present referenced STRING interaction, an enrichment has been performed to expand the network.**

|                                                                                    |                                                                                     |                                                                                      |                                                                                                                                                                                                                                     |
|------------------------------------------------------------------------------------|-------------------------------------------------------------------------------------|--------------------------------------------------------------------------------------|-------------------------------------------------------------------------------------------------------------------------------------------------------------------------------------------------------------------------------------|
| 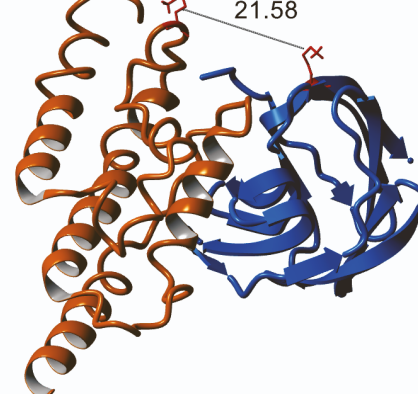    |     |     |                                                                                                                                                   |
| IP_136846-LGALS1<br>crosslink position = 21.58Å<br>center energy = -487.3          | IP_248552-MFSD11<br>crosslink position = 25.46Å<br>center energy = -908.5           | IP_295919-PDIA4<br>crosslink position = 35.45Å<br>center energy = -825.2             | IP_557247-ORC1<br>crosslink position = 35.03Å<br>center energy = -951.6                                                                                                                                                             |
|   |   |   |                                                                                                                                                 |
| IP_594208-PTN<br>crosslink position = 20.36Å<br>center energy = -569.2             | IP_614697-CANX<br>crosslink position = 20.15Å<br>center energy = -664.4             | IP_620377-ARIH2<br>crosslink position = 21.02Å<br>center energy = -622               | IP_2267193-IGSF22<br>crosslink position = 20.79Å<br>center energy = -858.1                                                                                                                                                          |
|  |  |  | <p><b>Figure S2. Predicted interaction models docked in ClusPro for the RefProts (blue) and AltProts (orange). Related to Figures 6 and 7. The distance between the residues crosslinked is displayed for each interaction.</b></p> |
| IP_789671-RALA<br>crosslink position = 13.36Å<br>center energy = -732.2            | IP_2322359-DENND4A<br>crosslink position = 17.92Å<br>center energy = -977.7         | IP_627699-H3F3A<br>crosslink position = 14.04Å<br>center energy = -860.9             |                                                                                                                                                                                                                                     |
|  |  |  |                                                                                                                                                                                                                                     |
| IP_2292176-HLA-B<br>crosslink position = 20.11Å<br>center energy = -847.7          | [PEP]IP_2292176-HLA-B<br>crosslink position = 16.72Å<br>center energy = -587.1      | IP_2284785-HLA-A<br>crosslink position = 29.68Å<br>center energy = -761.2            |                                                                                                                                                                                                                                     |
|  |  |  |                                                                                                                                                                                                                                     |
| IP_2331010-H4C1<br>crosslink position = 17.18Å<br>center energy = -914.1           | IP_709097-H4C1<br>crosslink position = 20.25Å<br>center energy = -629.5             | IP_672441-H4C1<br>crosslink position = 10.18Å<br>center energy = -858.8              |                                                                                                                                                                                                                                     |

# IP\_756980

MEKQLLEELE RQRQAELAAQ KARERKLARM  
AAEEHTLQDT GQDRGRTCKT

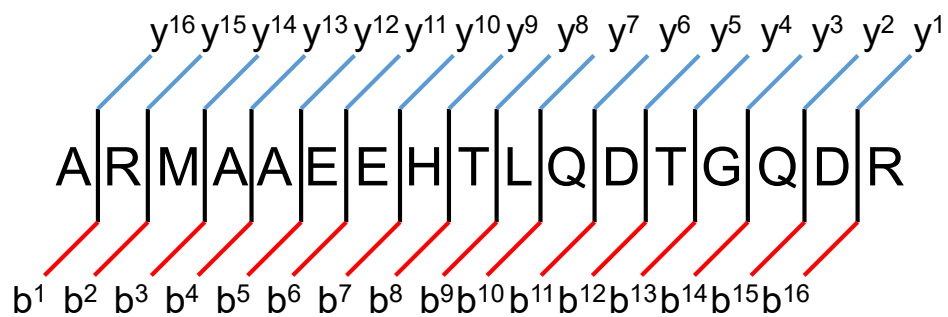

Protein BLAST: No significant similarity was found  
NextProt Peptide uniqueness checker: Peptide not found

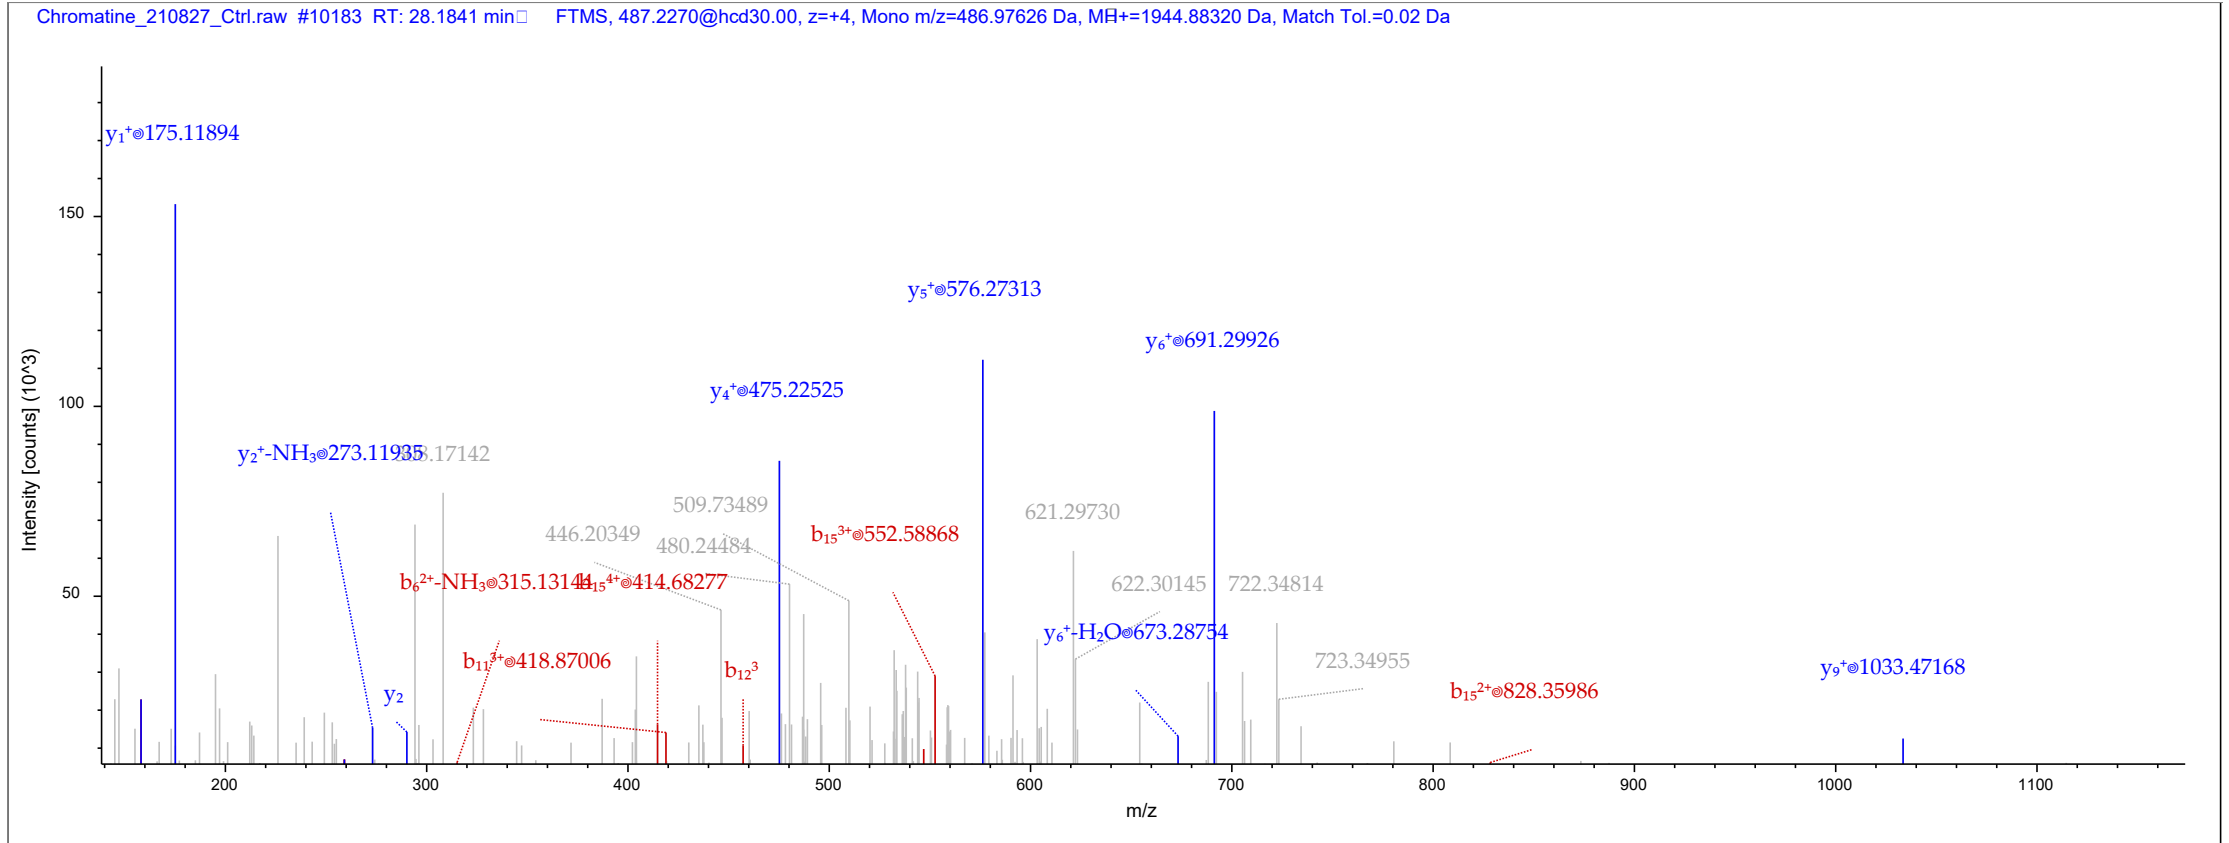

**Figure S3. Tandem mass spectrum for the peptide ARMAAEEHTLQDT GQDRGRTCKT which was unique for the AltProt IP\_756980. Related to STAR Methods.** In red (b ions) and in blue (y ions) are observed in the spectra. No significant similarity was found for this AltProt in protein BLAST. Additionally, the peptide was not identified at NextProt Peptide uniqueness checker.

# ( $\alpha$ ) IP\_295919 – ( $\beta$ ) PDIA4

Max. XlinkX Score: 46.35

CSM:1

NextProt Peptide uniqueness checker: Peptide not found

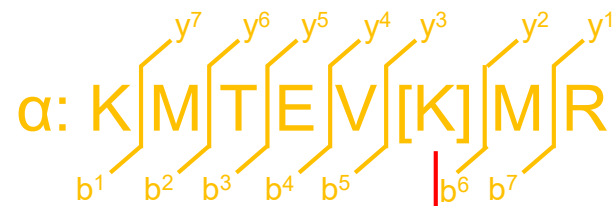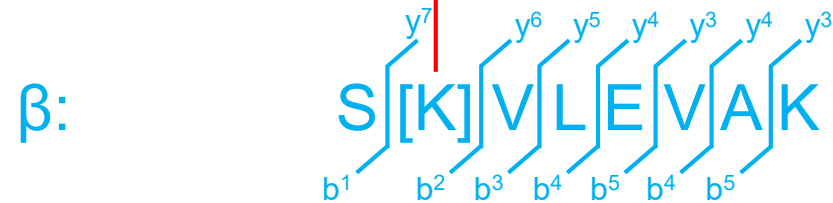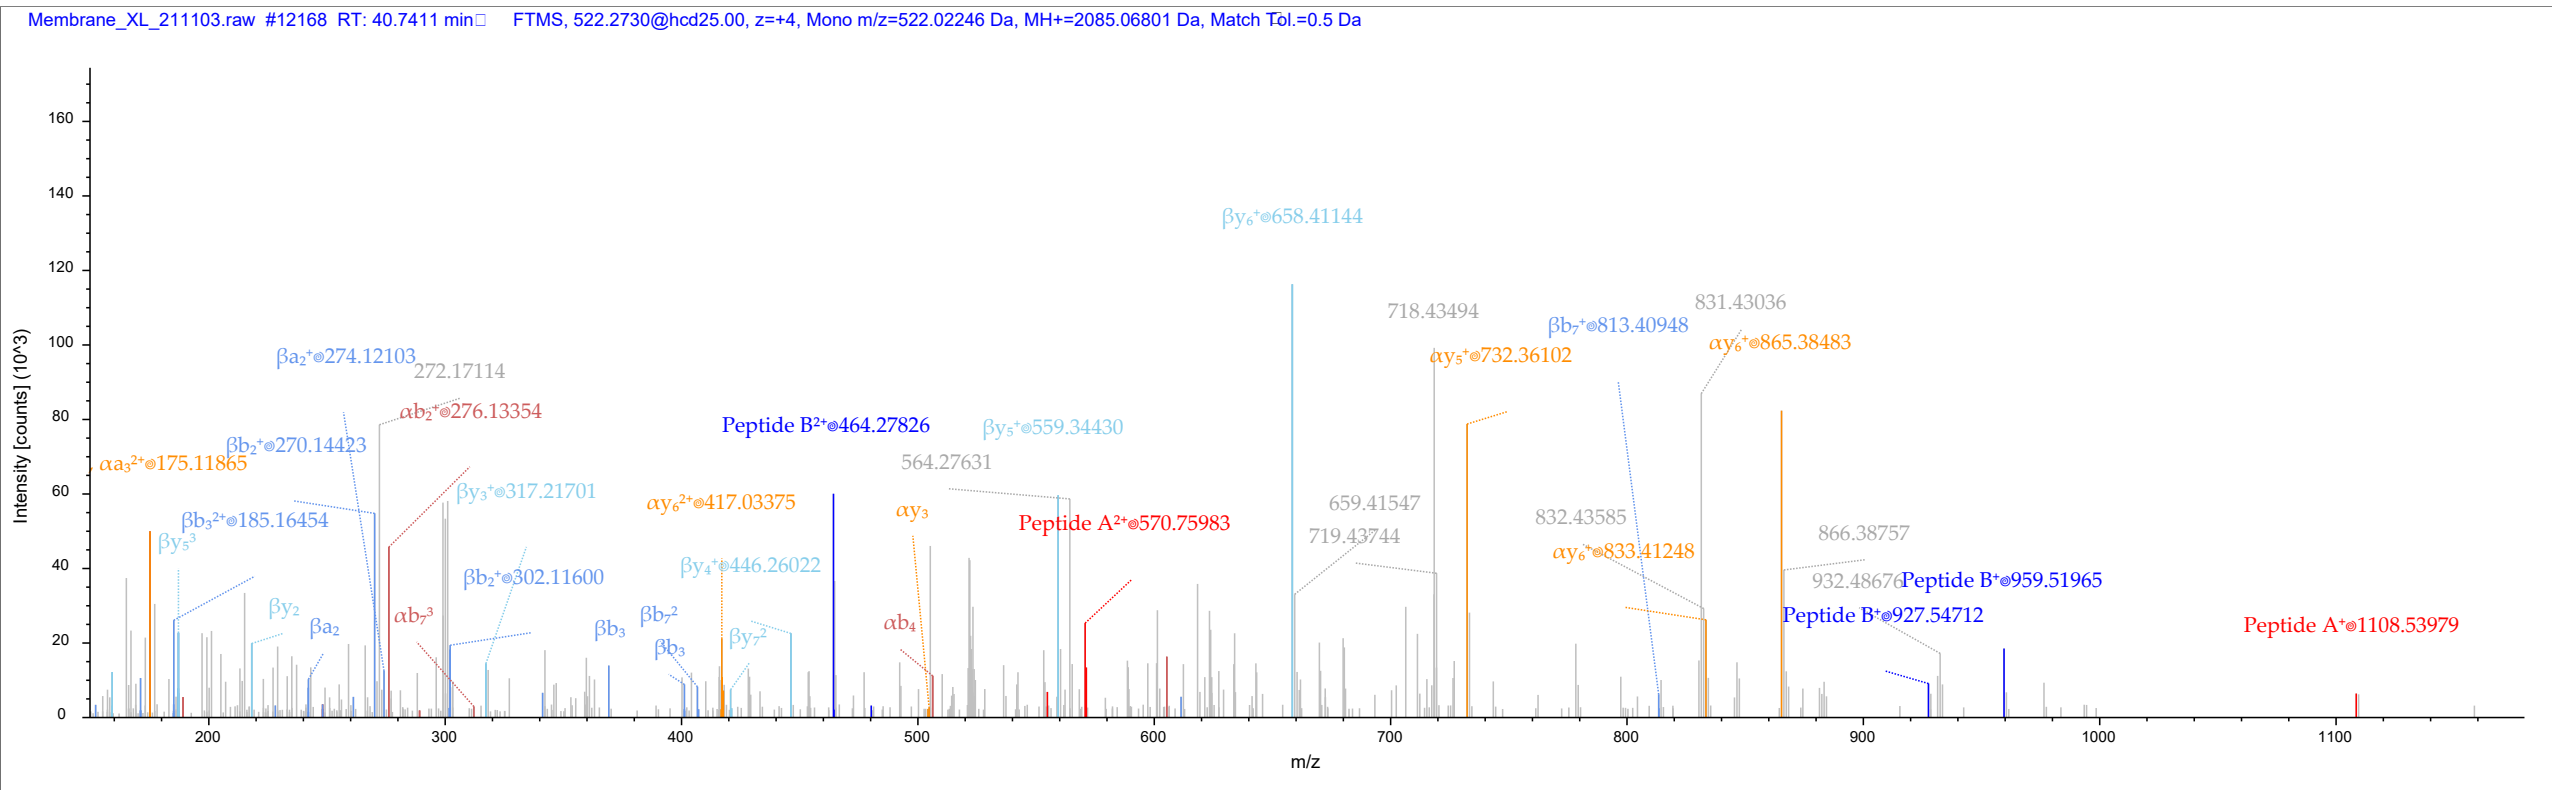

**Figure S4. Crosslinking tandem mass spectrum which identified the interaction between IP\_295919 (orange) and PDIA4 (blue). Related to STAR Methods.** The b and y ions for the individual and crosslinking peptides are observed. The unique peptide of IP\_295919 was not identified at NextProt.

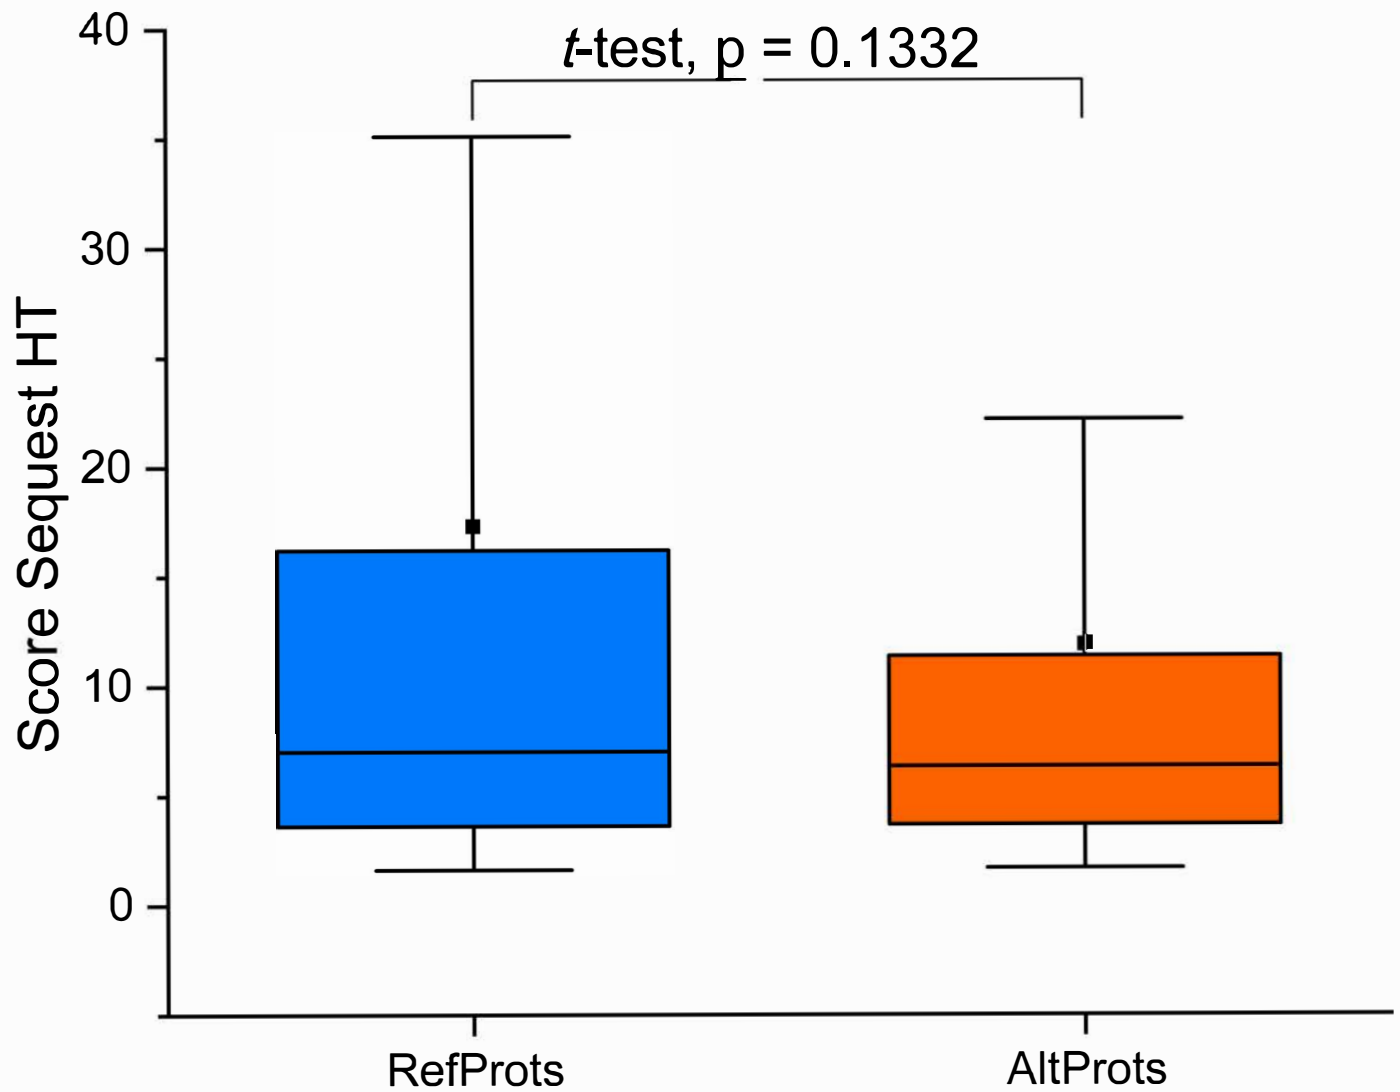

**Figure S5.** Boxplot of the Sequest HT Scores from the RefProts (blue) and AltProts (orange) identified using at least one peptide and OpenProt from the nuclear fraction. Related to STAR Methods. The Sequest HT Scores are not significantly different between RefProts (n=5764) and AltProts (n=151) (t-test, average Sequest HT Score 17.29 vs 11.91,  $p = 0.1332$ ).
